# Supplementary material for: The influence of plant odours on sexual readiness in an insectivorous songbird
Source: Oxford University Press journal article supplement (doi:10.1242/jeb.245313), 2023-03-06
Supplement: jeb245313supp.pdf [file jeb245313supp.pdf]

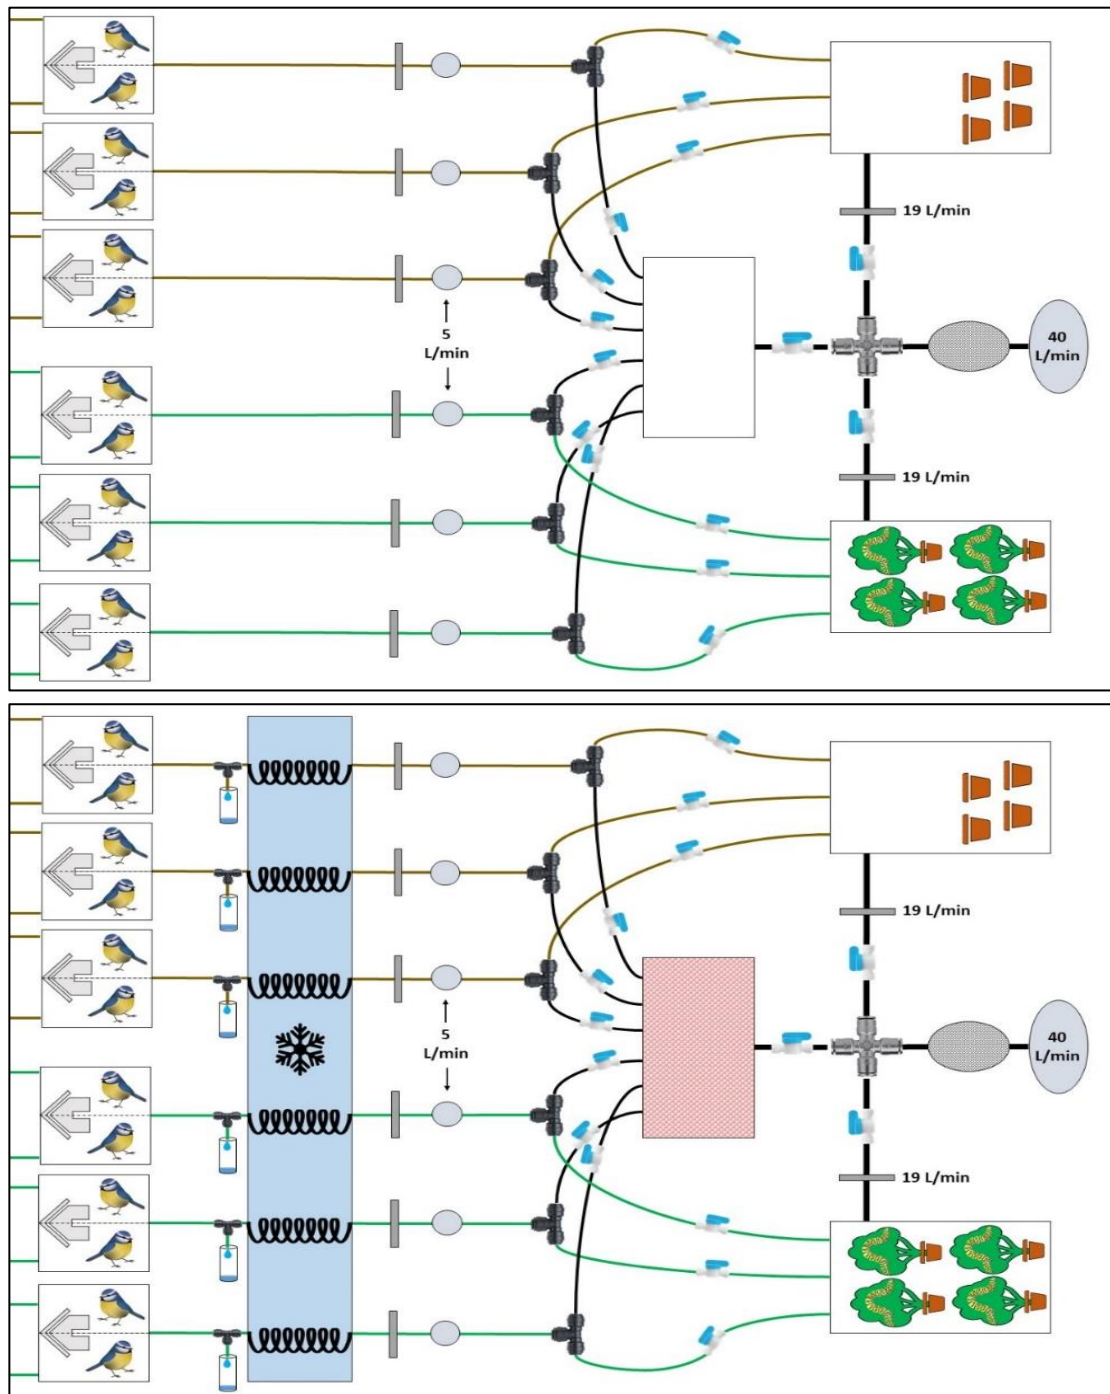

**Fig. S1.** Diagram of the experimental setup in 2019 (A) and 2020 (B). Air was purified through a charcoal filter before being split to one experimental and one control enclosure. Smaller pumps pulled air from the enclosure at 5 L/min and to the terrarium. In 2020, silica gel was used to remove moisture from the air when flow was not through the enclosures, and a cooling system was used to condense and remove water from the system. Diagram represents only half of the experimental setup, but both halves were set up identically.
